# Supplementary material
Source: PubMed Central journal article supplement (PMC6400324)
Supplement: NIHMS1516464-supplement-Supplemental_Data_File__doc__pdf__etc__.pdf [file NIHMS1516464-supplement-Supplemental_Data_File__doc__pdf__etc__.pdf]

# Individual & Family Self-Management Theory Applied to Breast and Nipple Pain Self-Management

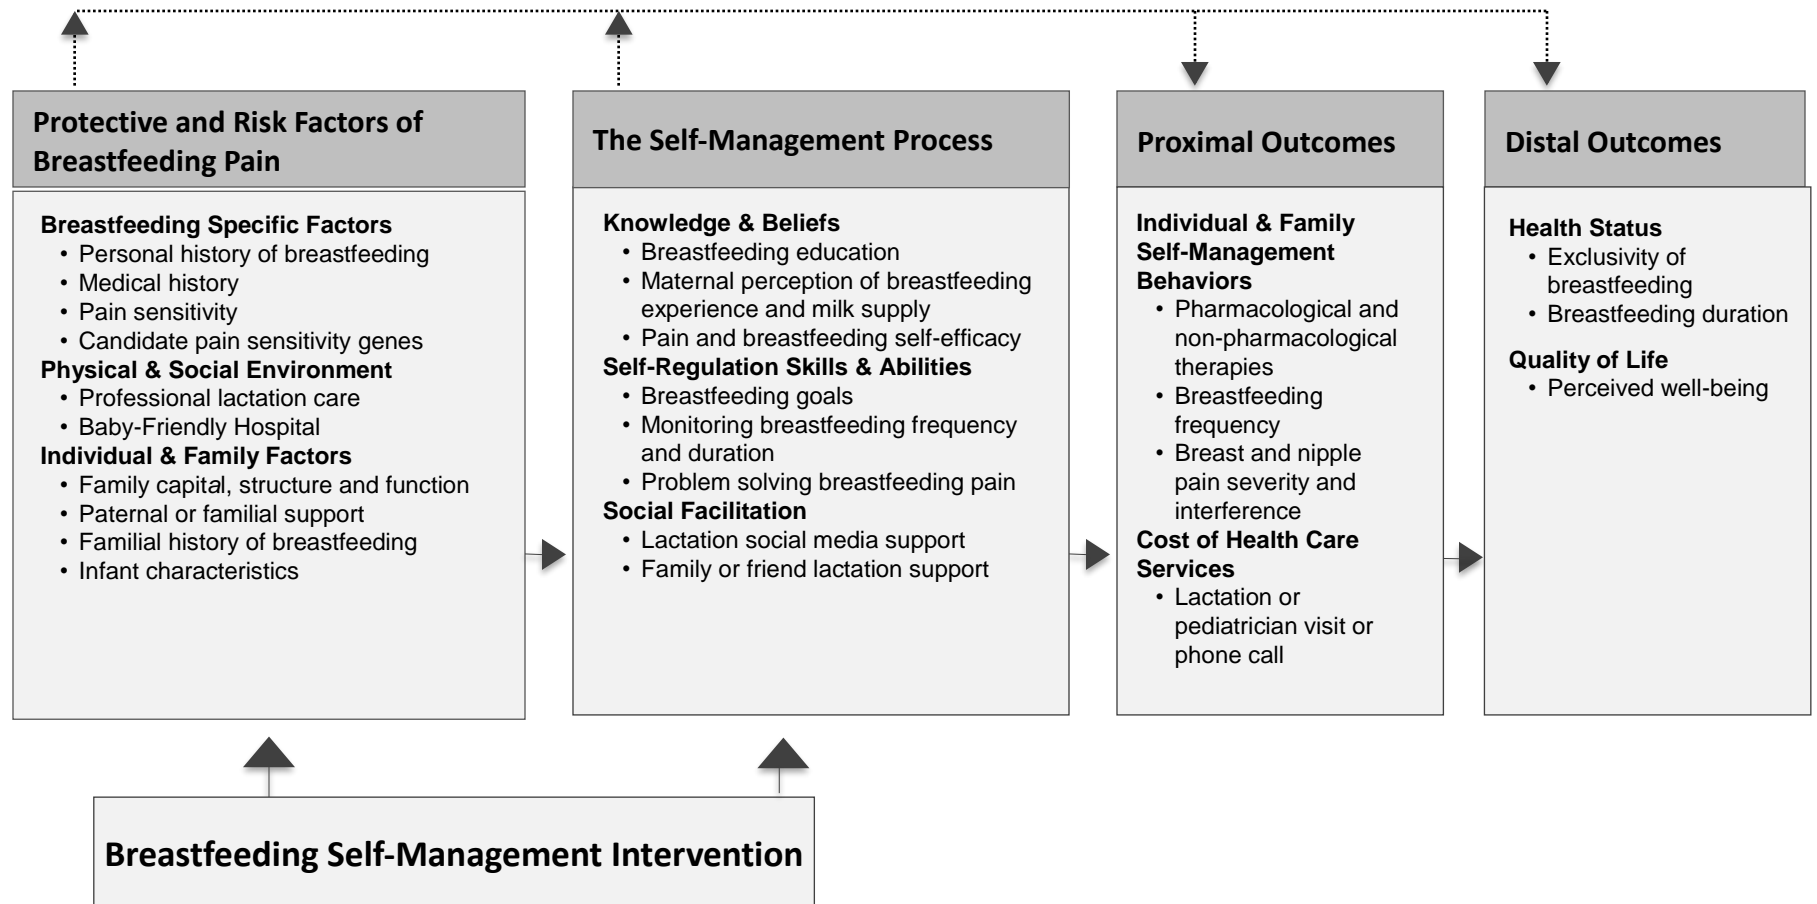

**Supplemental Figure1.** Model of Breast and Nipple Pain Self-Management. Adapted from *Individual and Family Self-Management Theory*, by P. A. Ryan and K. J. Sawin retrieved from [www.nursing.uwm.edu/smsc](http://www.nursing.uwm.edu/smsc). Copyright 2009, 2014 by Ryan and Sawin. Adapted with permission.

**Supplemental Table 1. Pain Measurements Comparison between Groups**

| Measurement                               | Week | Sample<br>( <i>N</i> = 56) |               | BSM Group<br>( <i>n</i> = 26) |               | Control Group<br>( <i>n</i> = 30) |               | <i>α p</i> -<br><i>value</i> |
|-------------------------------------------|------|----------------------------|---------------|-------------------------------|---------------|-----------------------------------|---------------|------------------------------|
|                                           |      | <i>M</i>                   | ( <i>SD</i> ) | <i>M</i>                      | ( <i>SD</i> ) | <i>M</i>                          | ( <i>SD</i> ) |                              |
| VAS Breast<br>and Nipple<br>Pain Severity | 0    | 29.5                       | (23.5)        | 28.1                          | (22.8)        | 29.5                              | (24.4)        | .895                         |
|                                           | 1    | 40.3                       | (23.2)        | 32.5                          | (21.7)        | 47.0                              | (22.7)        | .014                         |
|                                           | 2    | 32.0                       | (24.8)        | 22.7                          | (21.0)        | 40.0                              | (25.3)        | .006                         |
|                                           | 6    | 13.6                       | (18.2)        | 11.5                          | (18.6)        | 15.5                              | (17.9)        | .093                         |
| BPI Intensity                             | 0    | 4.45                       | (1.70)        | 4.47                          | (1.72)        | 4.43                              | (1.71)        | .935                         |
|                                           | 1    | 3.20                       | (1.50)        | 3.05                          | (1.36)        | 3.36                              | (1.62)        | .490                         |
|                                           | 2    | 2.81                       | (1.59)        | 2.33                          | (1.20)        | 3.23                              | (1.78)        | .029                         |
|                                           | 6    | 1.01                       | (1.45)        | 0.84                          | (1.45)        | 1.17                              | (1.47)        | .061                         |
| BPI<br>Interference                       | 0    | 3.22                       | (2.54)        | 3.16                          | (2.60)        | 3.26                              | (2.53)        | .877                         |
|                                           | 1    | 1.56                       | (1.98)        | 1.21                          | (1.64)        | 1.87                              | (2.21)        | .230                         |
|                                           | 2    | 0.91                       | (1.44)        | 0.73                          | (1.07)        | 1.06                              | (1.71)        | .411                         |
|                                           | 6    | 0.56                       | (1.11)        | 0.52                          | (1.38)        | 0.59                              | (0.82)        | .854                         |

Note. BSM = Breastfeeding Self-Management; BPI = Brief Pain Inventory; M = Mean; SD. = Standard Deviation; p = p-value; <sup>a</sup>Two sample t-test for pain severity and BPI Intensity, Box-Cox transformation was used for non-normal distributed data, permutation test was used for BPI Interference.
